# 1 Identifying A- and P-site locations on ribosome-protected mRNA 2 fragments using Integer Programming

3  
4 Nabeel Ahmed<sup>1, ¶</sup>, Pietro Sormanni<sup>2, ¶</sup>, Prajwal Ciryam<sup>2, #</sup>, Michele Vendruscolo<sup>2</sup>, Christopher M. Dobson<sup>2</sup>  
5 and Edward P. O'Brien<sup>1, 3, \*</sup>

6  
7 <sup>1</sup>Bioinformatics and Genomics Graduate Program, The Huck Institutes of the Life Sciences, Pennsylvania  
8 State University, University Park, PA, USA

9 <sup>2</sup>Department of Chemistry, University of Cambridge, Cambridge, UK

10 <sup>3</sup>Department of Chemistry, Pennsylvania State University, University Park, PA, USA

11

12 ¶ These authors contributed equally to this work.

13 # Present address: Department of Neurology, Columbia University College of Physicians and Surgeons,  
14 New York, NY, USA

15 \*To whom correspondence should be addressed. Tel: (814) 867-5100; Fax: (814) 865-2927; Email:  
16 epo2@psu.edu

17

## 18 Abstract

19 Identifying the A- and P-site locations on ribosome-protected mRNA fragments from Ribo-Seq experiments  
20 is a fundamental step in the quantitative analysis of transcriptome-wide translation properties at the codon  
21 level. Many analyses of Ribo-Seq data have utilized heuristic approaches applied to a narrow range of  
22 fragment sizes to identify the A-site. In this study, we use Integer Programming to identify A-site by  
23 maximizing an objective function that reflects the fact that the ribosome's A-site on ribosome-protected  
24 fragments must reside between the second and stop codons of an mRNA. This identifies the A-site location  
25 as a function of the fragment's size and reading frame in Ribo-Seq data generated from *S. cerevisiae* and  
26 mouse embryonic stem cells. The correctness of the identified A-site locations is demonstrated by showing  
27 that this method, as compared to others, yields the largest ribosome density at established stalling sites.  
28 By providing greater accuracy and utilization of a wider range of fragment sizes, our approach increases  
29 the signal-to-noise ratio of underlying biological signals associated with translation elongation at the codon  
30 length scale.

31

## 32 Introduction

33 Translation is a fundamental cellular process and an important step of gene expression resulting in the  
34 production of proteins in cells [1]. In the past decade the advent of Ribo-Seq (also known as Ribosome  
35 profiling), a high-throughput Next-Generation Sequencing method [2,3], has enabled the transcriptome-  
36 wide study of translation. Ribo-Seq involves rapidly halting translation in cells through the use of antibiotics  
37 or flash freezing followed by cell lysis and then digestion of the lysate using an RNase enzyme [4]. The  
38 resulting pool of ribosome-protected mRNA fragments is then amplified and sequenced. The number and  
39 length of mRNA fragments that map to the coding sequences (CDSs) of transcripts is a function of the  
40 location and number of ribosomes that were sitting at a particular location on different copies of the same  
41 transcript. Where the ribosome's A- and P-sites were located on a fragment during the digestion step is not  
42 known *a priori*, additional information and assumptions must be introduced to estimate their locations. Since  
43 translation occurs at the A- and P-sites, the identification of these sites is critical to address translation-  
44 related questions. If the A- and P-sites are not accurately identified, then systematic or random error can  
45 diminish the statistical power of any underlying biological signal that might exist. The identification of the A-  
46 and P-sites within ribosome footprints is therefore fundamental to quantitatively understanding translation  
47 at the codon length scale.

48 Because of the importance of this assignment problem, a number of methods for identifying the A- and  
49 P-sites have been created [2,5–13]. Many of these approaches utilize the biological fact that only the P-site  
50 is permitted to occupy the start codon during translation initiation and only the A-site is permitted to occupy  
51 the stop codon during termination. Using such approaches, the A-site location in *S. cerevisiae* Ribo-Seq  
52 datasets, for example, has been estimated to be 15 nt from the 5' end of ribosome-protected mRNA  
53 fragments of size 28 nt [2,14]; 16 nt for fragment size 29 nt [14]; 15 nts from the 5' end of fragments that  
54 are 30 nt in length [15] and frame-specific offsets of 14 to 17 nts from the 5' end for fragments between 28  
55 and 30 nt in length [12,16]. The P-site location offset is 3 nt prior to the A-site. Similarly, in mouse embryonic  
56 stem cells (mESCs), such approaches have yielded specific offsets for different fragment lengths [11].

57 Here, we utilize the fundamental biological fact that the A-site on ribosome-protected fragments must  
58 reside within the CDS of a gene under normal growth conditions and without any upstream open reading  
59 frames. We use this fact to create an objective function that, when maximized, identifies where the  
60 ribosome's A- and P-sites are most likely to be located on a ribosome-protected mRNA fragment. We apply  
61 our method to *S. cerevisiae* and mESCs Ribo-Seq datasets and show that, compared to other methods,  
62 our approach has greater accuracy and statistical power in identifying A- and P-site locations and assigning  
63 read density.

## 64 Methods

### 65 Integer Programming Algorithm

66 In the analysis of Ribo-Seq data, mRNA fragments are initially aligned onto the reference transcriptome  
67 and their location is reported with respect to their 5' end. This means that one fragment will contribute one  
68 read that is reported on the genome coordinate to which the 5' end nucleotide of the fragment is aligned  
69 (Fig 1A). In Ribo-Seq data, fragments of different lengths are observed that can arise from incomplete  
70 digestion of RNA and from the stochastic nature of mRNA cleavage by the RNase used in the experiment  
71 (Figs 1C-D, S1). A central challenge in quantitatively analyzing Ribo-Seq data is to identify from these Ribo-  
72 Seq reads where the A- and P-site were located at the time of digestion. It is non-trivial to do this since  
73 incomplete digestion and stochastic cleavage can occur at both ends of the fragment. For example, a  
74 fragment of size 29 can be digested in two different ways resulting in the A-site being positioned differently  
75 relative to the 5' end of the fragment (Fig 1B). The quantity that we need to accurately estimate is the  
76 number of nucleotides that separate the codon in the A-site from the 5' end of the fragment, which we refer  
77 to as the offset and denote  $\Delta$ . Knowing  $\Delta$  determines the position of the A-site as well as the P-site since it  
78 is always at  $\Delta$  minus 3 nt.

79 Our solution to this problem relies on the biological fact that for canonical transcripts with no upstream  
80 translation, the A-site of actively translating ribosomes must be located between the second codon and  
81 stop codon of an open reading frame (ORF) [17]. Therefore, the optimal offset value  $\Delta$  for fragments of a  
82 particular size ( $S$ ) and reading frame ( $F$ ) that map onto gene  $i$  is the one that maximizes the total number  
83 of reads  $T(\Delta|i, S, F)$  between these codons. The size of an mRNA fragment  $S$  is measured in nucleotides,  
84 and the frame  $F$  has values of 0, 1 or 2 and corresponds to the frame in which the 5' end nucleotide of the  
85 fragment is located. This concept can be expressed in terms of Integer Programming [18], a mathematical  
86 optimization procedure, in which an objective function is maximized subject to integer and linear restraints.  
87 With  $\Delta$  as the decision variable, the objective function in this case is  $T(\Delta|i, S, F) = \sum_{j=4}^{N_{C,i}} RP(j, \Delta|i, S, F)$ , where  
88  $N_{C,i}$  is the number of nucleotides in the CDS of gene  $i$  and  $RP(j, \Delta|i, S, F)$  is a vector containing all fragments  
89 of size  $S$  and frame  $F$  mapped onto gene  $i$  whose 5' end is at nucleotide position  $j$  on the transcript and  
90 then shifted along the transcript by a value of  $\Delta$ . The optimal  $\Delta$ , denoted  $\Delta'$ , for a given  $(S, F)$  for gene  $i$  is  
91 determined as  $\max\{T(\Delta|i, S, F)\}$  subject to the constraints [1] that  $0 \leq \Delta \leq S$ , and [2] that the modulus of  $\frac{\Delta}{3} =$   
92 0. Constraint [1] enforces the requirement that the A-site is located between the first and last nucleotide of  
93 the fragment of size  $S$  nts. Constraint [2] maintains the frame of the 5'-most nucleotide of the fragment as  
94 the Ribo-Seq reads are shifted by an amount  $\Delta$ . We enforce Constraint [2] because ultimately, we are  
95 interested in the assignment of reads to the A-site at the resolution of a codon, not an individual nucleotide.  
96 If we did not enforce constraint 2 our algorithm would yield equal  $T(\Delta|i, S, F)$  scores for the other two frames  
97 that the 5' end is not in as they would also map the A-site to the same codon. Therefore, to simplify the  
98 determination of offsets we implemented constraint [2]. Thus, by maximizing  $T(\Delta|i, S, F)$  for each gene's  
99 CDS in a data set of  $N_g$  genes, we will obtain a set of  $N_g$  values of  $\Delta'$ . From this distribution of  $\Delta'$  values,  
100 the A-site location corresponds to the most probable  $\Delta'$  value.

101 While identifying the  $\Delta'$  value for each gene in our data set, we also minimize the occurrence of false  
102 positives by ensuring that the highest score,  $T(\Delta'|i, S, F)$ , is significantly higher than the next highest score,  
103  $T(\Delta''|i, S, F)$ , which occurs at a different offset  $\Delta''$ . If the difference between the top two scores is less than  
104 the average number of reads per codon, we apply the following additional selection criteria. To choose  
105 between  $\Delta'$  and  $\Delta''$ , we select the one that yields a number of reads at the start codon that is at least one-  
106 fifth less than the average number of reads at the second, third and fourth codons. We further require that  
107 the second codon have a greater number of reads than the third codon. The biological basis for these  
108 additional criteria are that the true offset (*i.e.*, the actual location of the A-site) cannot be located at the start  
109 codon, and that the number of reads at the second codon should be higher on average than the third codon  
110 due to contributions from the initiation step of translation, during which the ribosome is assembling on the  
111 mRNA with the start codon in the P-site. In the Results section, we demonstrate that the results from our  
112 method are largely robust to changes in these thresholds.

### 113 **Ribo-Seq datasets**

114 **S. cerevisiae.** Published Ribo-Seq data from *S. cerevisiae* were obtained from GSM1557447 used in the  
115 study of Pop and co-workers [19]. The raw reads were pre-processed according to the method stated in  
116 the original study. Raw fastq files were downloaded and preprocessed using Fastx-toolkit (v0.013)  
117 ([http://hannonlab.cshl.edu/fastx\\_toolkit/index.html](http://hannonlab.cshl.edu/fastx_toolkit/index.html)) as stated in the methods of the original study. The  
118 adapter sequence CTGTAGGCACCATCAAT was stripped using FastQ clipper and low-quality reads were  
119 filtered by FastQ quality filter. The processed reads were aligned first to the ribosomal RNA sequences  
120 using Bowtie 2 (v2.2.3)[20]. The reads which did not align to the ribosomal sequences were then aligned  
121 to the *Saccharomyces cerevisiae* assembly R64-2-1 (UCSC: sacCer3) using Tophat (v2.0.13)[21] with up  
122 to two mismatches allowed. Gene annotations were obtained from Saccharomyces Genome Database  
123 (<http://www.yeastgenome.org/>) on May 4, 2016 for 6,572 protein-coding genes. Reads were assigned to  
124 the nucleotide positions according to the 5' end.

125 The pooled Ribo-Seq dataset was formed by combining reads from all replicates of *S. cerevisiae* Ribo-  
126 Seq data published in studies in which cycloheximide (CHX) was not used to induce translation arrest [14–  
127 16,19,22–28]. It has been demonstrated that CHX pre-treatment leads to distortion of ribosome profiles due  
128 to ribosome slippage even after CHX treatment [12,22]. The distorted ribosome profiles can spill across  
129 the CDS boundaries thus limiting the application of Integer Programming algorithm. Hence, our analysis  
130 only uses those datasets without CHX pre-treatment. The list of all the utilized datasets is reported in Table  
131 S1. The raw reads from each study were processed according to the reported method in the original study.  
132 If the method is not reported in the original study, we use cutadapt (v1.14) [29] to pre-process the raw  
133 reads. The alignment and assignment of reads to gene transcripts was done as above for the Pop dataset  
134 [19].

135 **Mouse embryonic stem cells.** The “no drug” sample for mouse embryonic stem cells (mESCs) measured  
136 by Ingolia and co-workers [11] was utilized in this study. Since CHX treatment has been shown to artificially

137 alter ribosome profiles in *S. cerevisiae*, we believed it prudent to not use mESC samples pre-treated with  
138 CHX. To increase the coverage we pooled reads from another untreated Ribo-Seq sample of mESCs  
139 published in the study of Hurt and co-workers [30]. The linker sequence  
140 CTGTAGGCACCATCAATTCGTATGCCGTCTTCTGCTTGAA for Ingolia's dataset and the poly-A adapter  
141 sequence for Hurt's dataset were trimmed using cutadapt (v1.14) [29]. The trimmed reads were first aligned  
142 to ribosomal RNA sequences using Bowtie2 (v2.2.3) [20] and the filtered reads were subsequently aligned  
143 to mm10 reference transcriptome consisting of 21,185 genes obtained from UCSC knownGene database  
144 using Tophat (v2.0.13) [21] with up to two mismatches allowed. For a gene with multiple isoforms, only the  
145 isoform with the longest CDS was included in the reference transcriptome. For transcripts with no  
146 information on the 5' UTR region, we included 40 nt of genomic sequence upstream from the start codon  
147 for successful alignment of reads around start codon and effective application of Integer Programming  
148 algorithm. Translation initiation site data was obtained from Table S3 of study of Ingolia and co-workers  
149 [11]. We selected genes that have only one translation initiation site coding for only a canonical CDS  
150 product. From these genes, only genes containing a single isoform were selected, resulting in 430 genes  
151 in our final dataset.

152 ***Escherichia coli***. Wild-type Ribo-Seq data for *E.coli* were obtained from studies of Li and co-workers  
153 (2012) [31], Li and co-workers (2014) [32] and Woolstenhulme and co-workers [33]. The accession numbers  
154 of the samples used are provided in Table S1. The respective linker sequences in each sample were  
155 trimmed using cutadapt (v1.14) [29]. Reads were initially aligned to ribosomal RNA sequences using  
156 Bowtie2 (v2.2.3) [20] and the rest of reads aligned to the *E.coli* reference genome build NC\_000913.3 using  
157 Tophat (v2.0.13) [21] with up to two mismatches allowed. Gene annotations were obtained for 4314 genes  
158 from RefSeq database corresponding to NC\_000913.3.

## 159 **Gene selection, analyses and statistical tests**

160 **Selection of genes.** To obtain good sampling statistics, we select for analysis only those genes that have  
161 on average greater than 1 read per codon per fragment length per reading frame. This means that different  
162 sets of genes can be used in the Integer Programming algorithm depending on the fragment length and  
163 frame under scrutiny. The average number of reads per codon was calculated on the CDS region of the  
164 gene and an additional upstream region corresponding to the size of the fragment length being considered.  
165 Genes in which more than 1% of the total number of mapped reads, for a given  $S$  and  $F$ , mapped to multiple  
166 locations across the genome were discarded from further analysis.

167 **Identifying unique offsets.** We define the most probable offset  $\Delta'$  to have a unique, unambiguously  
168 identified A-site if at least 70% of genes in the dataset have an offset equal to  $\Delta'$ , and further require that  
169 there be at least 10 genes in the dataset. Otherwise, the A-site location is defined as ambiguous for the  
170 fragment size and frame under scrutiny. In the Results section, we show the A-site location is largely robust  
171 to moderate variation in this 70% threshold.

172 **High coverage test.** To test for the effect of depth of coverage on the A-site location we increased the  
173 average number of reads per codon required for a gene to be included in the analyzed dataset from 1 to  
174 values up to 50. Three requirements have to be met for an ambiguous offset to be identified as unique as  
175 coverage is increased. As before, 70% of the genes had to have the most probable offset with at least 10  
176 genes in the dataset. In addition, there must to be a statistically significant increasing trend in the most  
177 probable offset with increasing coverage. This requirement prevents fluctuations above 70% due to  
178 statistical error as being counted as a unique offset. This trend is calculated using Linear Regression  
179 Analysis.

180 **Statistical significance of PPX and XPP motifs.** To test if the normalized read density distribution of a  
181 PPX or XPP motif is not due to random chance, we calculate the  $P$ -value using a permutation test [34]. For  
182 the total number of instances of a PPX/XPP motif, we randomly select an equal number of instances of any  
183 other three-residue motif and determine the median normalized read density at the third codon position of  
184 the motif, thereby creating a random distribution. We do this procedure 10,000 times and calculate the  
185 fraction of iterations that have a median density equal to or greater than the one observed for that PPX/XPP  
186 motif. This fraction is equal to the  $P$ -value. The instances of PPX and XPP motifs are identified from those  
187 transcripts that have at least 50% of codon positions with 1 read or more.

188 **Comparison with other A-site mapping methods.** We compare the performance of Integer Programming  
189 algorithm with other methods by calculating the difference in normalized read density between the Integer  
190 Programming A-site value and the compared method's A-site value at the third codon of PPG and PPE  
191 motifs, which are associated with ribosome pausing in *S. cerevisiae* and mESCs respectively.

192 In *S. cerevisiae*, A-site ribosome profiles were obtained for Integer Programming method by applying  
193 the offsets listed in Table 1 for fragment sizes 24 to 34 nt. For methods used by Martens and co-workers  
194 [5] and Hussmann and co-workers [12] specifically in *S. cerevisiae*, A-site profiles were obtained by  
195 applying the offsets for specific fragment sizes as stated in the Methods sections of those studies. We  
196 include a constant heuristic offset of 15 nt which has been used in several studies of *S. cerevisiae* Ribo-  
197 Seq data [2,35–37]. The constant offset of 15 nt has been applied to a wide range of fragment lengths  
198 across studies including 22-32 nt [2], 27-30 nt [35], 28 nt [36], 27-34 nt [37]. To be conservative, we apply  
199 a constant offset of 15 nt to fragments between 27 and 30 nt only. Similarly, we also include a method  
200 where a constant offset of 18 nt is applied to fragments between 27 and 30 nt to compare to the performance  
201 of the Integer Programming method.

202 For mESCs, Ingolia and co-workers [11] implemented length specific offsets of 15, 16 and 17 nts from  
203 the 5' end, respectively, for fragments of size 29-30 nt, 31-33 nt and 34-35 nt. Several studies have also  
204 implemented a constant offset of 15 for range of fragment sizes 25-35 nt [38,39]. Similar to *S. cerevisiae*,  
205 we also implement a constant offset of 18 nt to fragment size range of 25-35 nt.

206 Few general methods have been proposed to determine A-site locations in any organism. We  
207 implemented the methods riboWaltz [9], Plastid [7] and RiboProfiling [8] which are publicly available as R



208 packages. The A-site offset tables generated using these methods for our analyzed datasets in *S.*  
209 *cerevisiae* and mESCs are presented in Table S8. To determine the A-site profiles using the ‘ribodeblur’  
210 method created by Wang and co-workers [6], we ran the source code available in GitHub  
211 (<https://github.com/Kingsford-Group/ribodeblur-analysis/releases/tag/v0.1>) on our datasets and added a  
212 custom Python script to generate the ‘deblurred’ A-site profiles. For Rpbp [40], the publicly available  
213 software was downloaded and run locally to obtain the A-site offsets. We also applied the center-weighted  
214 method as described by Becker and co-workers [41]; for reads greater than 23 nt, we trim 11 nt from both  
215 ends of the fragment and distribute the read equally among the remaining nucleotides. For scikit-ribo  
216 method [10], the source code was downloaded and was successfully run for *S. cerevisiae* datasets to obtain  
217 the A-site profiles. Scikit-ribo could not be run on mouse ESC data as the current available version of the  
218 source code contains bugs resulting in inaccurate annotation assignments for higher eukaryotic genomes.

219 Instances of PPG motifs (in *S. cerevisiae*) and PPE motifs (in mESCs) used for analysis are selected  
220 from genes in which at least 90% of codon positions have at least 1 read in their 5’ aligned ribosome profiles  
221 in the CDS region and an upstream region of 18 nt. An instance of a motif is included for analysis only if its  
222 ribosome density is greater than 1.5 of average ribosome density at the third codon position in the A-site  
223 profile of any compared methods. We use the Wilcoxon signed rank test to determine if there is a statistically  
224 significant difference between the normalized read density at the third codon of motif instances obtained by  
225 Integer Programming and other methods.

## 226 Results

### 227 Illustrating the Integer Programming optimization procedure

228 To illustrate this Integer Programming algorithm in action we provide an example using the hypothetical  
229 mRNA shown in Fig 2. The algorithm is as follows: First, for gene  $i$ , consider  $RP(j, \Delta=0|i, S, F)$  composed  
230 of those fragments of size  $S$  ( $= [20, 21, \dots, 35]$  nt) and whose 5’ end has been aligned to reading frame  $F$   
231 ( $= 0, 1$  or  $2$ ). Second, for this ribosome profile, determine the  $\Delta$  that maximizes  $T(\Delta|i, S, F)$ . Do this by  
232 starting from the 5’-end-aligned ribosome profile ( $\Delta=0$ ) and shift it three nucleotides at a time (*i.e.*, obey  
233 Constraint 2 described in Methods) towards the 3’ end of the transcript such that  $\Delta = 0, 3, 6, 9, \dots, \leq S$ . At  
234 each value of  $\Delta$ , calculate  $T(\Delta|i, S, F)$  and record its value. Third, after all  $\Delta$  values have been tested,  
235 the  $\Delta$  that maximizes  $T(\Delta|i, S, F)$  is denoted  $\Delta'$ , which is the putative location of the A-site relative to 5’ end  
236 of fragments of size  $S$  and frame  $F$  for gene  $i$ . Check if the secondary-selection criteria are required and  
237 apply them when the scores for the top two offsets differ by less than the average number of reads per  
238 codon in the mRNA. Finally, repeat these steps for every fragment size between 20-35 nts in length and  
239 every reading frame. Thus, for one gene, this procedure yields 48 ( $=16 \times 3$ ) independent values for  $\Delta'$ , one  
240 for each fragment size and frame combination.

241 The fragment-size and frame distributions of ribosome-protected fragments (Figs 1C, D) in *S. cerevisiae*  
242 are not gene dependent (Fig S2), and therefore, neither should be the offset values. Thus, the location of

243 the A-site, relative to the 5' end of a fragment of size  $S$  and frame  $F$ , corresponds to the most probable  
244 value of the offset across all the genes in the dataset.

## 245 **A-site locations in *S. cerevisiae* Ribo-Seq data are fragment size and frame** 246 **dependent**

247 We first applied the Integer Programming method to Ribo-Seq data from *S. cerevisiae* published by Pop  
248 and co-workers [19]. For each combination of  $S$  and  $F$  we first identified those genes that have at least 1  
249 read per codon on average in their corresponding ribosome profile. The number of genes meeting this  
250 criterion is reported in Table S2. We then applied the Integer Programming method to this subset of genes.  
251 The resulting distributions of  $\Delta$  values are shown in Fig 3A for different combinations of fragment length  
252 and frame. We only show results for fragment sizes between 27 and 33 nt because greater than 90% of  
253 reads map to this range (Fig 1C). The most probable offset value for all fragment sizes between 20 to 35  
254 nt is reported as an offset table (Table S4).

255 We see that the optimal  $\Delta$  value - that is, the A-site location - changes for different combinations of  $S$   
256 and  $F$ , with the most probable values either at 15 or 18 nt. Thus, the location of the A-site depends on  $S$   
257 and  $F$ . In most cases, there is one dominant peak for a given pair of  $S$  and  $F$  values. For example, for  
258 fragments of size 27 through 30 nt in frame 0, greater than 70% of their per-gene optimized  $\Delta$  values are  
259 15 nt from the 5' end of these fragments. Similar results are found for other combinations such as sizes 30,  
260 31 and 32 nt in frame 1 and 28 through 32 nt in frame 2, where optimized  $\Delta$  values are 18 nt. Thus, across  
261 the transcriptome, the A-site codon position on these fragments is uniquely identified.

262 There are, however,  $S$  and  $F$  combinations that have ambiguous A-site locations based on these  
263 distributions. For example, for fragments of size 27 nt in frame 1, 47% of the gene-optimized  $\Delta$  values are  
264 at 15 nt while 30% are at 18 nt. Similar results are observed for fragments 28 and 29 nt in frame 1, and 31  
265 and 32 nt in frame 0. Thus, for these  $S$  and  $F$  combinations there is a similar probability of the A-site being  
266 located at one codon or another, and therefore we cannot uniquely identify the A-site's location.

## 267 **Higher coverage leads to more unique offsets**

268 We hypothesized that ambiguity in identifying the A-site for particular  $S$  and  $F$  combinations may be due to  
269 low coverage (*i.e.*, sampling poor statistics). To test this hypothesis, we pooled the reads from different  
270 published Ribo-Seq datasets into a single dataset with consequently higher coverage and more genes that  
271 meet our selection criteria (Table S2). Application of our method to this Pooled dataset gives unique offsets  
272 for more  $S$  and  $F$  combinations compared to the original Pop dataset (Fig 3B and Table S4), supporting our  
273 hypothesis. For example, for fragments of size 27 and frame 1, now we have the unique offset of 15 nt with  
274 72% of gene-optimized  $\Delta$  values at 15 nt (Fig 3B). However, we still see the ambiguity present for certain  
275 ( $S, F$ ) combinations.

276 We employed an additional strategy to increase coverage by restricting our analysis to genes with  
277 greater and greater average reads per codon. If the hypothesis is correct, then we should see a statistically



278 significant trend of an increase in the most probable  $\Delta$  value with increasing read depth. We applied this  
279 analysis to the Pooled dataset and find that some initially ambiguous  $S$  and  $F$  combinations become  
280 unambiguous as coverage increases. For example, at an average of 1 read per codon,  $(S, F)$  combinations  
281 of  $(25, 0)$ ,  $(27, 2)$  and  $(30, 1)$  are ambiguous as they fall below our 70% threshold. However, we see a  
282 statistically significant trend ( $slope = 0.5$ ,  $p = 3.94 \times 10^{-6}$ ) for fragments of  $(25, 0)$  that the 15 nt offset  
283 becomes more probable upon increasing the coverage, eventually crossing the 70% threshold (Fig 4A).  
284 Similarly, for  $(27, 2)$  ( $slope = 0.58$ ,  $p = 5.77 \times 10^{-5}$ ) and  $(30, 1)$  ( $slope = 0.25$ ,  $p = 0.009$ ) there is a trend  
285 towards an offset of 18 nt, with more than 70% of genes having this offset at the highest coverage (Figs  
286 4B, C). Hence, for these fragments, increasing coverage uniquely identifies  $\Delta'$  and hence the A-site location.  
287 For a few combinations of  $(S, F)$ , like  $(32, 0)$ , the ambiguity is not resolved even upon very high coverage  
288 (Fig 4D), which we speculate may be due to inherent features of nuclease digestion being equally likely for  
289 more than one offset.

290 Thus, high enough coverage yields the optimal offset table represented in Table 1, where the offset is  
291 the most probable location of the A-site relative to the 5' end of the mRNA fragments generated in *S.*  
292 *cerevisiae*.

### 293 **Consistency across different datasets**

294 Ribo-Seq data is sensitive to experimental protocols that can introduce biases in the digestion and ligation  
295 of ribosome-protected fragments. Pooling datasets together offers the advantage of higher coverage but it  
296 may mask the biases specific to an individual dataset. To determine whether our unique offsets (Table 1)  
297 are consistent with results from individual data sets we applied the Integer Programming algorithm to each  
298 individual dataset. Most of these datasets have low coverage resulting in fewer genes meeting our filtering  
299 criteria (File S1). For each unique offset in Table 1, we classify it as consistent with an individual data set  
300 provided that the most probable offset from the individual dataset (even if it does not reach the 70%  
301 threshold due to limitations in the depth of coverage) is the same as in Table 1. We find that the vast majority  
302 of unique offsets (18 out of 20) in Table 1 are consistent across 75% or more of the individual datasets  
303 (statistics reported in Table S5). Just two  $(S, F)$  combinations show frequent inconsistencies.  $(S, F)$   
304 combinations  $(27, 1)$  and  $(27, 2)$  are inconsistent in 33% or more of the individual datasets. (Table S5). This  
305 suggests that researchers who wish to minimize false positives should discard these  $(S, F)$  combinations  
306 when creating A-site ribosome profiles.

### 307 **Robustness of the offset table to threshold variation**

308 The Integer Programming algorithm utilizes two thresholds to identify unique offsets. One is that 70% of  
309 genes exhibit the most probable offset, the other, designed to minimize false positives arising due to  
310 sampling noise in the Ribo-Seq data, is that the reads in the first codon be less than one-fifth of the average  
311 reads in the second, third and fourth codon. While there are good reasons to introduce these threshold  
312 criteria, the exact values of these thresholds are arbitrary. Therefore, we tested whether varying these

313 thresholds changes the results reported in Table 1. We varied the first threshold to 60% and 80%, and  
314 recomputed the offset table. We report whether the unique offset changed by listing an 'R' or 'S' (for robust  
315 and sensitive, respectively) alongside the reported offset in Table S5. We find that two-thirds of the unique  
316 ( $S, F$ ) combinations do not change (Table S5). ( $S, F$ ) combinations (25, 0), (25, 2), (27, 0), (27, 1),  
317 (28, 1), (31, 0), (33, 0) and (33, 2) become ambiguous when we increased the threshold to 80%.

318 We varied the second, aforementioned threshold from one-fifth up to one and down to one-tenth, and  
319 we find that all unique ( $S, F$ ) combinations except (25, 2), (33, 0), (33, 2) and (34, 1) remain unchanged  
320 (reported as 'R' in Table S5). Thus, in summary, in the vast majority of cases, the unique offsets reported  
321 in Table 1 depend very little on specific values of these thresholds.

### 322 **A-site offsets in mouse embryonic stem cells**

323 The biological fact that A-site of a ribosome resides only between the second and stop codon is not limited  
324 to *S. cerevisiae* and hence the Integer Programming algorithm should be applicable to Ribo-Seq data from  
325 any organism. Therefore, we applied our method to a Pooled Ribo-Seq dataset of mouse embryonic stem  
326 cells (mESCs). The resulting A-site offset table exhibited ambiguous offsets at all but three ( $S, F$ )  
327 combinations (Table S6). In mESCs there is widespread translation elongation that occurs beyond the  
328 boundaries of annotated CDS regions in upstream open reading frames (uORFs) [38]. Enrichment of  
329 ribosome-protected fragments from these translating uORFs can make it difficult for our algorithm to find  
330 unique offsets because they can contribute reads around the start codon of canonical annotated CDSs.  
331 Therefore, we hypothesized that if we apply our algorithm to only those transcripts devoid of uORFs and  
332 possessing a single initiation site then our algorithm should identify more unique offsets. Ingolia and co-  
333 workers [11] have experimentally identified for well-translated mESCs transcripts its number of initiation  
334 sites and whether uORFs are present using translation-initiation inhibiting drug Harringtonine. Therefore,  
335 we selected those genes that have only one translation initiation site near the annotated start codon and  
336 further restricted our analysis to transcripts with a single isoform, as multiple isoforms can have different  
337 termination sites.

338 Application of Integer Programming algorithm to this set of genes increases the number of unique  
339 offsets from 3 to 13 ( $S, F$ ) combinations (Table S7). Applying the same robustness and consistency tests  
340 as we did in *S. cerevisiae* reveals that 77% of the unique offsets are robust to threshold variation, and a  
341 similar percentage is consistent across both individual datasets used to create the Pooled data (Table S7).  
342 Thus, the unique offsets we report for mESCs are robust and consistent in the vast majority of datasets.  
343 This result also indicates that successful identification of A-site locations requires analysing only those  
344 transcripts that do not contain uORFs.

### 345 **Integer Programming does not yield unique offsets for *E.coli***

346 As a further test of how widely we can apply our algorithm, we applied it to a Pooled Ribo-Seq data from  
347 the prokaryotic organism *E. coli*. The number of genes meeting our filtering criteria is reported in Table S3.  
348 MNase, the nuclease used in the *E. coli* Ribo-Seq protocol, digests mRNA in a biased manner - favoring

349 digestion from the 5' end over the 3' end [33,42]. Therefore, as done in other studies [33,42,43], we applied  
350 our algorithm such that we identified the A-site location as the offset from the 3' end instead of the 5' end.  
351 Polycistronic mRNAs (*i.e.*, transcripts containing multiple CDSs) can cause problems for our algorithm due  
352 to closely spaced reads at boundaries of contiguous CDS being scored for different offsets in both the  
353 CDSs. To avoid inaccurate results, we restrict our analysis to the 1,915 monocistronic transcripts that do  
354 not have any other transcript within 40 nt upstream or downstream of the CDS. Based on our experience  
355 in the analysis of mESCs dataset, we filter out transcripts with multiple translation initiation sites as well as  
356 transcripts whose annotated initiation sites have been disputed. Nakahigashi and co-workers [44] have  
357 used tetracycline as translation inhibitor to identify 92 transcripts in *E.coli* with different initiation sites from  
358 the reference annotation and we exclude these transcripts from our analysis. However, for this high  
359 coverage pooled dataset, we find ambiguous offsets for all (*S,F*) combinations ( Table S6). A meta-gene  
360 analysis of normalized ribosome density in the CDS and 30 nt region upstream and downstream reveal  
361 signatures of translation beyond the boundaries of the CDS (Fig S3), especially a higher than average  
362 enrichment of reads a few nucleotides before the start codon. We speculate that the base-pairing of the  
363 Shine-Dalgarno (SD) sequence with the complementary anti-SD sequence in 16S rRNA [45] protects these  
364 few nucleotides before the start codon from ribonuclease digestion and hence results in an enrichment of  
365 Ribo-Seq reads. Since these “pseudo” ribosome-protected fragments cannot be differentiated from actual  
366 ribosome-protected fragments containing a codon with the ribosome’s A-site on it, our algorithm is limited  
367 in its application for this data.

### 368 **Reproducing known PPX and XPP motifs that lead to translational slowdown**

369 In *S. cerevisiae* [46] and *E. coli* [33,47] certain PPX and XPP polypeptide motifs (in which X corresponds  
370 any one of the 20 amino acids) can stall ribosomes when the third residue is in the A-site. Elongation  
371 factors eIF5A (in *S. cerevisiae*) and EF-P (in *E. coli*) help relieve the stalling induced by some motifs but  
372 not others [46]. Even in mESCs, Ingolia and co-workers [11] detected PPD and PPE as strong pausing  
373 motifs. Therefore, we examined whether our approach can reproduce the known stalling motifs. We did this  
374 by calculating the normalized read density at the different occurrences of a PPX and XPP motif.

375 In *S. cerevisiae*, we observe large ribosome densities at PPG, PPD, PPE and PPN (Fig 5A), all of which  
376 were classified as strong stalling motifs in *S. cerevisiae* [46] and also in *E. coli* [47]. In contrast, there is no stalling,  
377 on average, at PPP, consistent with other studies [46]. This is most likely due to the action of eIF5A. For  
378 the XPP motifs, the strongest stalling is observed for GPP and DPP motifs, which are consistent with the  
379 results in *S. cerevisiae* and in *E. coli* (Fig 5B). In mESCs, we see the strongest stalling at PPE and PPD,  
380 reproducing the results of Ingolia and co-workers [11] (Fig S4A). For XPP motifs, we observe very weak  
381 stalling only for DPP (Fig S4B). Thus, our approach to map the A-site on ribosome footprints enables the  
382 accurate detection of established translation pausing at particular PPX and XPP nascent polypeptide motifs.

### 383 **Greater A-site location accuracy than other methods**

384 There is no independent experimental method to verify the accuracy of identified A-site locations using our  
385 method or any other method [4,5,40,41,48–50,6–10,12,13,37]. We argue that the well-established  
386 ribosome pausing at particular PPX sequence motifs is the best available means to differentiate the  
387 accuracy of existing methods. The reason for this is that these stalling motifs have been identified in *E.coli*  
388 [51,52] and *S. cerevisiae* [53] through orthogonal experimental methods (including enzymology studies and  
389 toe printing), and the exact location of the A-site during such a slowdown is known to be at the codon  
390 encoding the third residue of the motif [51]. Thus, the most accurate A-site identification method will be the  
391 one that most frequently assigns greater ribosome density to X at each occurrence of the PPX motif.

392 We apply this test to the strongest stalling PPX motifs, *i.e.*, PPG in *S. cerevisiae* and PPE in mESCs. In  
393 *S. cerevisiae*, the Integer Programming method yields the greatest ribosome density at the glycine codon  
394 of PPG motif when applied to both the Pooled (Fig 6A) and Pop datasets (Fig S5A). Examining each  
395 occurrence of PPG in the transcriptome, we find that in a majority of instances our method assigns more  
396 ribosome density to glycine than every other method when applied to both the Pooled (Fig 6B, Wilcoxon  
397 signed-rank test ( $n = 224$ ),  $P < 0.0005$  for all methods except Hussmann ( $P = 0.164$ )) and Pop datasets  
398 (Fig S5B, Wilcoxon signed-rank test ( $n = 35$ ),  $P < 10^{-5}$  for all methods except Hussmann ( $P = 0.026$ ) and  
399 Ribodeblur ( $P = 0.01$ )). The same analyses applied to mESCs at PPE motifs shows that our method  
400 outperforms the other nine methods (Figs 6C-D) with our method assigning greater ribosome density at  
401 glutamic acid for at least 85% of the PPE motifs in our dataset as compared to all other methods (Fig 6D,  
402 Wilcoxon signed-rank test ( $n = 104$ ),  $P < 10^{-15}$  for all methods). Thus, for *S. cerevisiae* and mESCs our  
403 Integer Programming approach is more accurate than other methods in identifying the A-site on ribosome-  
404 protected fragments.

405 A large number of molecular factors influence codon translation rates and ribosome density along  
406 transcripts [54]. One factor is the cognate tRNA concentration, in which codons with higher cognate tRNA  
407 concentrations have lower ribosome densities [15,16,55]. Therefore, as an additional qualitative test, we  
408 expect that most accurate A-site method will yield the strongest correlation between the ribosome density  
409 at a codon and its cognate tRNA concentration. Using tRNA abundances previously estimated from RNA-  
410 Seq data for *S. cerevisiae* [16], we find that our Integer Programming method yields the largest correlation  
411 coefficient compared to the eleven other methods (Table S9), further supporting the accuracy of our  
412 method. (We were unable to run this test in mESCs as measurements of tRNA concentration have not been  
413 reported in the literature.)

## 414 Discussion

415 We have introduced a method to determine the A- and P-site locations on ribosome-protected mRNA  
416 fragments, and shown that it is more accurate than other methods in correctly assigning ribosome density  
417 to the glycine residue in PPG motifs and glutamic acid residue in PPE motifs, which are strong translation-  
418 stalling sites in *S. cerevisiae* and mESCs, respectively. Our method is unique amongst existing methods  
419 because it (*i*) uses a probabilistic approach to identify the A-site location through Integer Programming

420 optimization and (ii) has an objective function rooted in the biology of translation – meaning that its  
421 optimization enforces the fact that the A-site location of most reads must have been between the second  
422 and stop codons of the CDSs. To be sure, several methods use biological features to assign the A-site  
423 (such as having more reads around the start and stop codons than in the UTR [2,11]). However, ours is the  
424 only method that also utilizes feature (i), which is beneficial because the stochastic nature of mRNA  
425 cleavage during the digestion-step of Ribo-Seq necessitates a probabilistic perspective. Our method is not  
426 entirely probabilistic since we have to set thresholds and apply a secondary criterion to arrive at a final  
427 offset value. These measures are unavoidable due to the variability in coverage between different genes.  
428 However, we find that the results are robust to variation in thresholds and mostly consistent across different  
429 Ribo-Seq datasets. Hence, the respective A-site offset tables provided for *S. cerevisiae* and mouse  
430 embryonic stem cells can be applied to any dataset from these organisms.

431 Noteworthy about our test for accuracy is that it is based on results from orthogonal experimental  
432 techniques. The stalling of translation at glycine in PPG motifs is well-documented [33,46,51–53] and in *S.*  
433 *cerevisiae* the Integer Programming method assigns higher Ribo-Seq reads at the glycine codon at most  
434 instances of PPG compared to other A-site methods. In mESCs PPE is the strongest stalling motif [11].  
435 The Integer Programming method outperforms other methods by assigning, on average, 176% more reads  
436 at the glutamic acid codon compared to other methods. These results indicate that the Integer Programming  
437 method presented in this study is more accurate than existing methods. One reason for this increase in  
438 accuracy, among many possible reasons, may be that most methods only use reads from around the start  
439 codon, while our method uses reads from around both the start and stop codons.

440 A potential point of confusion may arise from the distributions shown in Fig 3 in which there are two  
441 highly probable offset values, raising the question of whether or not there are multiple A-site locations for a  
442 given fragment size and frame. In almost all cases, there is one unique most probable A-site location, but  
443 this ambiguity can arise from poor read coverage on a gene or stochastic fluctuations in the extent of  
444 digestion on one side of an mRNA fragment compared to the other. Consider fragment size 28 in frame 1.  
445 In the Pop data set (top, middle panel of Fig 3A), approximately half of the genes have  $\Delta = 15$  nt, while the  
446 others have  $\Delta = 18$  nt, meaning the A-site could be at either location. When we increase the read coverage  
447 of the genes, however, we see that the vast majority of the offsets shift to 15 nt (bottom, middle panel in  
448 Fig 3B). Thus, the original A-site ambiguity was not due to multiple, equally possible A-site locations, but  
449 rather the true A-site location was hard to detect without better coverage. Consider another example. For  
450  $S = 27$  and  $F = 1$  we observe in Fig 3A that 8% of genes have an optimal  $\Delta = 0$ , seemingly suggesting that  
451 the A-site is located at the 5'-end on a subset of fragments. Spot-checking the ribosome profiles of these  
452 genes, we find that these genes contain no reads in the 27 nt region upstream of the second codon and 27  
453 nt upstream of the stop codon (data not shown). Thus, the values of  $T(\Delta|i, S, F)$  for all  $\Delta$  were equal and  
454 the optimal  $\Delta$  was arbitrarily assigned a value of 0. In the higher coverage Pooled dataset, however, there  
455 are only 2% of genes with optimal  $\Delta = 0$  for  $S = 27$  and  $F = 1$ . Hence, as we increase coverage, the



456 proportion of genes with spurious offsets decreases. Thus, offsets away from the most probable offset arise  
457 from sampling issues, not from multiple A-site locations.

458 We note that we set a threshold of 70% to determine a most-probable offset for each fragment size and  
459 reading frame and demonstrated that the results are robust to variation with this threshold (Table Table).  
460 Therefore, the A-site assignments reported in Table 1 represent the most likely location of the A-site relative  
461 to the 5' end of mRNA fragments produced from Ribo-Seq experiments on *S. cerevisiae*.

462 Some ( $S, F$ ) combinations (such as  $S = 32$  and  $F = 0$ , in Table 1) appear to be inherently ambiguous,  
463 that is, increasing their coverage does not lead to a unique A-site assignment (Fig 4D). We do not know  
464 the reason for this result, but we speculate that these are situations where there are truly multiple equally  
465 probable A-site locations. Another possibility is that the ribosome adopts different conformations in these  
466 situations that result in different read lengths and offsets, leading to ambiguity [14]. The important point is  
467 that the A-site cannot be accurately assigned in these situations. We therefore recommend that researchers  
468 discard reads from these ( $S, F$ ) combinations to minimize chances of erroneous A-site assignments. We  
469 believe it will have negligible effect on the A-site profiles since these combinations contribute only 2.9% of  
470 total reads in the Pooled dataset.

471 We have found that the Integer Programming algorithm is sensitive to reads arising from outside the  
472 boundaries of annotated CDS regions from non-canonical sources like upstream ORFs (uORFs) or Internal  
473 Ribosome Entry Sites (IRES). Specifically, applying our method to Ribo-Seq data from mESCs yielded few  
474 unique offsets. It was only after removing genes that had multiple translation initiation sites, some arising  
475 from uORFs, that the number of unique offsets increased more than four-fold. The reason for this  
476 improvement was that by removing the uORFs, our method's assumption was met that the reads within 40  
477 nt of the start codon only arise from the annotated CDS. Our method was not able to identify any unique  
478 offsets in *E. coli* Ribo-Seq data even after we controlled for multiple translation initiation sites. We observed  
479 in *E. coli* a high enrichment of reads before the start codon after applying the conventional 12 nt offset from  
480 3' end [33] (Fig S3) which we speculate may be due to protection of mRNA segments involved in binding  
481 of the Shine-Dalgarno sequence to the ribosome [56] and could limit the accuracy of our method.

482 The next best method to the Integer Programming method is the Hussmann approach [12]. Besides  
483 more frequently assigning greater ribosome density to glycine in PPG motifs and exhibiting strong  
484 correlation with cognate tRNA abundances, the Integer Programming method is also superior because it  
485 provides greater statistical power and is based on biological features of translation rather than heuristic  
486 assumptions. Specifically, Hussmann's method only uses reads that are 28, 29 and 30 nt in length, whereas  
487 our method uses reads between 24 to 34 nt in length. This greater coverage results in greater statistical  
488 power for our method. Hussmann's method uses a nearest-neighbour heuristic to determine frame-specific  
489 offsets of +14, 15 or 16 for lengths 28 and 29 and offset of +15, 16 or 17 for length 30, whereas our method  
490 is based on the feature that the A-site be located within the CDS. The reason Hussman's method yields  
491 comparable results is that its offset table is highly similar to Table 1. If the reading frame is maintained after



492 applying the offset from the 5' end, then 8 out of 9 of Hussmann's offsets are the same as in Table 1 with  
493 the 9<sup>th</sup> offset of (29,1) being ambiguous in our method.

494 Our method preserves the original 3 nt periodicity found in the original 5'-end aligned mRNA fragments.  
495 Therefore, it is not designed for detecting frame-shifting, translation of upstream ORFs, or novel short  
496 peptides. Nevertheless, correct assignment of reads to the A-site codon is essential in a variety of other  
497 analyses, such as determining translation kinetics, and our method provides the most accurate assignment  
498 of ribosome density compared to other methods (Fig. 6 and Table S9).

499 In summary, we have created a method for A-site identification that is more accurate than existing  
500 methods in *S. cerevisiae* and mouse embryonic stem cells, utilizes a fundamental feature of translation to  
501 identify the A-site, and has revealed how the A-site location changes based on the size of the mRNA  
502 fragment and its frame. By increasing the accuracy and range of fragments for which the A-site can be  
503 identified, our approach can help future studies to measure translation elongation properties at the length  
504 scale of individual codons.

## 505 **Acknowledgements**

506 We thank the members of the O'Brien Lab for critical feedback on the manuscript. PS is supported by a  
507 Borysiewicz Biomedical Fellowship from the University of Cambridge. This work was supported by the  
508 research grant from the National Science Foundation ABI grant 1759860 to EPO.

## 509 **Author Contributions**

510 PS, PC and EPO conceived the study. NA, PS and EPO designed the computational analyses. PC, MV,  
511 CMD contributed to design of the computational analyses. NA and PS analyzed the data. NA and EPO  
512 wrote the manuscript. All authors reviewed and commented on the manuscript.

513

## 514 **Availability**

515 All source code is made available on the GitHub repository  
516 [https://github.com/nabeel1990/Asite\\_IP\\_method](https://github.com/nabeel1990/Asite_IP_method)

## 517 **Competing interests**

518 The authors declare no competing interests.

519

520

## 521 References

- 522 1. Calkhoven CF, Müller C, Leutz A. Translational control of gene expression and disease. Trends  
523 Mol Med. 2002;8: 577–583. doi:10.1016/S1471-4914(02)02424-3
- 524 2. Ingolia NT, Ghaemmaghami S, Newman JRS, Weissman JS. Genome-wide analysis in vivo of  
525 translation with nucleotide resolution using ribosome profiling. Science. 2009;324: 218–223.  
526 doi:10.1126/science.1168978
- 527 3. Ingolia NT. Ribosome Footprint Profiling of Translation throughout the Genome. Cell. Elsevier Inc.;  
528 2016;165: 22–33. doi:10.1016/j.cell.2016.02.066
- 529 4. Ingolia NT, Brar GA, Rouskin S, McGeachy AM, Weissman JS. The ribosome profiling strategy for  
530 monitoring translation in vivo by deep sequencing of ribosome-protected mRNA fragments. Nat  
531 Protoc. 2012;7: 1534–1550. doi:10.1038/nprot.2012.086
- 532 5. Martens AT, Taylor J, Hilser VJ. Ribosome A and P sites revealed by length analysis of ribosome  
533 profiling data. Nucleic Acids Res. 2015;43: 3680. doi:10.1093/nar/gkv200
- 534 6. Wang H, McManus J, Kingsford C. Accurate Recovery of Ribosome Positions Reveals Slow  
535 Translation of Wobble-Pairing Codons in Yeast. J Comput Biol. 2017;24: 486–500.  
536 doi:10.1089/cmb.2016.0147
- 537 7. Dunn JG, Weissman JS. Plastid: nucleotide-resolution analysis of next-generation sequencing and  
538 genomics data. BMC Genomics. BMC Genomics; 2016;17: 958. doi:10.1186/s12864-016-3278-x
- 539 8. Popa A, Lebrigand K, Paquet A, Nottet N, Robbe-Sermesant K, Waldmann R, et al. RiboProfiling:  
540 a Bioconductor package for standard Ribo-seq pipeline processing. F1000Research. 2016;5:  
541 1309. doi:10.12688/f1000research.8964.1
- 542 9. Lauria F, Tebaldi T, Bernabo P, Groen, N. E.J.G, H. T, et al. riboWaltz: optimization of ribosome P-  
543 site positioning in ribosome profiling data. BioRxiv. 2017; 1–18. doi:10.1101/169862
- 544 10. Fang H, Huang Y-F, Radhakrishnan A, Siepel A, Lyon GJ, Schatz MC. Scikit-ribo Enables  
545 Accurate Estimation and Robust Modeling of Translation Dynamics at Codon Resolution. Cell  
546 Syst. United States; 2018;6: 180–191.e4. doi:10.1016/j.cels.2017.12.007
- 547 11. Ingolia NT, Lareau LF, Weissman JS. Ribosome profiling of mouse embryonic stem cells reveals  
548 the complexity and dynamics of mammalian proteomes. Cell. Elsevier Inc.; 2011;147: 789–802.  
549 doi:10.1016/j.cell.2011.10.002
- 550 12. Hussmann JA, Patchett S, Johnson A, Sawyer S, Press WH. Understanding Biases in Ribosome  
551 Profiling Experiments Reveals Signatures of Translation Dynamics in Yeast. PLoS Genet.  
552 2015;11: e1005732. doi:10.1371/journal.pgen.1005732
- 553 13. Oh E, Becker AH, Sandikci A, Huber D, Chaba R, Gloge F, et al. Selective ribosome profiling  
554 reveals the cotranslational chaperone action of trigger factor in vivo. Cell. 2011;147: 1295–1308.  
555 doi:10.1016/j.cell.2011.10.044
- 556 14. Lareau LF, Hite DH, Hogan GJ, Brown PO. Distinct stages of the translation elongation cycle  
557 revealed by sequencing ribosome-protected mRNA fragments. Elife. 2014;2014: 1–16.

- 558 doi:10.7554/eLife.01257
- 559 15. Gardin J, Yeasmin R, Yurovsky A, Cai Y, Skiena S, Fitcher B. Measurement of average decoding  
560 rates of the 61 sense codons in vivo. *Elife*. 2014;3: e03735. doi:10.7554/eLife.03735
- 561 16. Weinberg DE, Shah P, Eichhorn SW, Hussmann JA, Plotkin JB, Bartel DP. Improved Ribosome-  
562 Footprint and mRNA Measurements Provide Insights into Dynamics and Regulation of Yeast  
563 Translation. *Cell Rep. The Authors*; 2016;14: 1787–1799. doi:10.1016/j.celrep.2016.01.043
- 564 17. Cooper G. Translation of mRNA. *The Cell: A Molecular Approach* [Internet]. 2nd ed. Sunderland,  
565 MA: Sinauer Associates; 2000. Available: <https://www.ncbi.nlm.nih.gov/books/NBK9839/>
- 566 18. Sierksma G. Linear and Integer Programming Theory and Practice [Internet]. 2nd ed. Mathematics  
567 P and A, editor. CRC Press; 2001. Available:  
568 [http://openlibrary.org/books/OL8124799M/Linear\\_Integer\\_Programming](http://openlibrary.org/books/OL8124799M/Linear_Integer_Programming)
- 569 19. Pop C, Rouskin S, Ingolia NT, Han L, Phizicky EM, Weissman JS, et al. Causal signals between  
570 codon bias , mRNA structure , and the efficiency of translation and elongation. *Mol Syst Biol*.  
571 2014;10: 770. doi:10.15252/msb.20145524
- 572 20. Langmead B, Salzberg SL. Fast gapped-read alignment with Bowtie 2. *Nat Methods*. 2012;9: 357–  
573 359. doi:10.1038/nmeth.1923
- 574 21. Kim D, Pertea G, Trapnell C, Pimentel H, Kelley R, Salzberg SL. TopHat2: accurate alignment of  
575 transcriptomes in the presence of insertions, deletions and gene fusions. *Genome Biol*. 2013;14:  
576 R36. doi:10.1186/gb-2013-14-4-r36
- 577 22. Gerashchenko M V., Gladyshev VN. Translation inhibitors cause abnormalities in ribosome  
578 profiling experiments. *Nucleic Acids Res*. 2014;42. doi:10.1093/nar/gku671
- 579 23. Guydosh NR, Green R. Dom34 rescues ribosomes in 3' untranslated regions. *Cell*. Elsevier;  
580 2014;156: 950–962. doi:10.1016/j.cell.2014.02.006
- 581 24. Jan CH, Williams CC, Weissman JS. “Principles of ER cotranslational translocation revealed by  
582 proximity-specific ribosome profiling.” *Science*. 2014;346: 748–751. doi:10.1126/science.aaa8299
- 583 25. Williams CC, Jan CH, Weissman JS. Targeting and plasticity of mitochondrial proteins revealed by  
584 proximity-specific ribosome profiling. *Science*. 2014;346: 748–751. doi:10.1126/science.1257522
- 585 26. Nedialkova DD, Leidel SA. Optimization of Codon Translation Rates via tRNA Modifications  
586 Maintains Proteome Integrity. *Cell*. The Authors; 2015;161: 1606–1618.  
587 doi:10.1016/j.cell.2015.05.022
- 588 27. Young DJ, Guydosh NR, Zhang F, Hinnebusch AG, Green R. Rli1/ABCE1 Recycles Terminating  
589 Ribosomes and Controls Translation Reinitiation in 3'UTRs In Vivo. *Cell*. Elsevier Ltd; 2015;162:  
590 872–884. doi:10.1016/j.cell.2015.07.041
- 591 28. Nissley DA, Sharma AK, Ahmed N, Friedrich UA, Kramer G, Bukau B, et al. Accurate prediction of  
592 cellular co-translational folding indicates proteins can switch from post- to co-translational folding.  
593 *Nat Commun*. 2016;7: 10341. doi:10.1038/ncomms10341
- 594 29. Martin M. Cutadapt removes adapter sequences from high-throughput sequencing reads.

- 595 EMBnet.journal. 2011;17: 10. doi:10.14806/ej.17.1.200
- 596 30. Hurt J a, Robertson AD, Burge CB. Global analyses of UPF1 binding and function reveals  
597 expanded scope of nonsense-mediated mRNA decay Global analyses of UPF1 binding and  
598 function reveals expanded scope of nonsense-mediated mRNA decay Department of Biology.  
599 2013; 1636–1650. doi:10.1101/gr.157354.113
- 600 31. Li G-W, Oh E, Weissman JS. The anti-Shine–Dalgarno sequence drives translational pausing and  
601 codon choice in bacteria. *Nature*. Nature Publishing Group; 2012;484: 538–541.  
602 doi:10.1038/nature10965
- 603 32. Li GW, Burkhardt D, Gross C, Weissman JS. Quantifying absolute protein synthesis rates reveals  
604 principles underlying allocation of cellular resources. *Cell*. Elsevier Inc.; 2014;157: 624–635.  
605 doi:10.1016/j.cell.2014.02.033
- 606 33. Woolstenhulme CJ, Guydosh NR, Green R, Buskirk AR. High-Precision analysis of translational  
607 pausing by ribosome profiling in bacteria lacking EFP. *Cell Rep*. 2015;11: 13–21.  
608 doi:10.1016/j.celrep.2015.03.014
- 609 34. Good P. Permutation, Parametric, and Bootstrap Tests of Hypothesis. Third. Springer Series in  
610 Statistics; 2005. doi:10.1007/978-0-387-98135-2
- 611 35. Artieri CG, Fraser HB. Accounting for biases in riboprofiling data indicates a major role for proline  
612 in stalling translation. *Genome Res*. 2014;24: 2011–2021. doi:10.1101/gr.175893.114
- 613 36. Qian W, Yang JR, Pearson NM, Maclean C, Zhang J. Balanced codon usage optimizes eukaryotic  
614 translational efficiency. *PLoS Genet*. 2012;8: e1002603. doi:10.1371/journal.pgen.1002603
- 615 37. Diamant A, Tuller T. Estimation of ribosome profiling performance and reproducibility at various  
616 levels of resolution. *Biol Direct*. Biology Direct; 2016;11: 24. doi:10.1186/s13062-016-0127-4
- 617 38. Ingolia NT, Brar GA, Stern-Ginossar N, Harris MS, Talhouarne GJS, Jackson SE, et al. Ribosome  
618 Profiling Reveals Pervasive Translation Outside of Annotated Protein-Coding Genes. *Cell Rep*.  
619 2014;8: 1365–1379. doi:10.1016/j.celrep.2014.07.045
- 620 39. Reid DW, Nicchitta C V. Primary role for endoplasmic reticulum-bound ribosomes in cellular  
621 translation identified by ribosome profiling. *J Biol Chem*. 2012;287: 5518–5527.  
622 doi:10.1074/jbc.M111.312280
- 623 40. Malone B, Atanassov I, Aeschmann F, Li X, Großhans H, Dieterich C. Bayesian prediction of RNA  
624 translation from ribosome profiling. *Nucleic Acids Res*. 2016;45: 2960–2972.  
625 doi:10.1093/nar/gkw1350
- 626 41. Becker AH, Oh E, Weissman JS, Kramer G, Bukau B. Selective ribosome profiling as a tool for  
627 studying the interaction of chaperones and targeting factors with nascent polypeptide chains and  
628 ribosomes. *Nat Protoc*. 2013;8: 2212–39. doi:10.1038/nprot.2013.133
- 629 42. O’Connor PBF, Li GW, Weissman JS, Atkins JF, Baranov P V. RRNA:mRNA pairing alters the  
630 length and the symmetry of mRNA-protected fragments in ribosome profiling experiments.  
631 *Bioinformatics*. 2013;29: 1488–1491. doi:10.1093/bioinformatics/btt184

- 632 43. Mohammad F, Woolstenhulme CJ, Green R, Buskirk AR. Clarifying the Translational Pausing  
633 Landscape in Bacteria by Ribosome Profiling. *Cell Rep. The Authors*; 2016;14: 686–694.  
634 doi:10.1016/j.celrep.2015.12.073
- 635 44. Nakahigashi K, Takai Y, Kimura M, Abe N, Nakayashiki T, Shiwa Y, et al. Comprehensive  
636 identification of translation start sites by tetracycline-inhibited ribosome profiling. *DNA Res.*  
637 2016;23: 193–201. doi:10.1093/dnares/dsw008
- 638 45. Malys N. Shine-Dalgarno sequence of bacteriophage T4: GAGG prevails in early genes. *Mol Biol*  
639 *Rep.* 2012;39: 33–39. doi:10.1007/s11033-011-0707-4
- 640 46. Schuller AP, Wu CCC, Dever TE, Buskirk AR, Green R. eIF5A Functions Globally in Translation  
641 Elongation and Termination. *Mol Cell. Elsevier Inc.*; 2017;66: 194–205.e5.  
642 doi:10.1016/j.molcel.2017.03.003
- 643 47. Peil L, Starosta AL, Lassak J, Atkinson GC, Virumae K, Spitzer M, et al. Distinct XPPX sequence  
644 motifs induce ribosome stalling, which is rescued by the translation elongation factor EF-P. *Proc*  
645 *Natl Acad Sci.* 2013;110: 15265–15270. doi:10.1073/pnas.1310642110
- 646 48. Charneski CA, Hurst LD. Positively Charged Residues Are the Major Determinants of Ribosomal  
647 Velocity. *PLoS Biol.* 2013;11: e1001508. doi:10.1371/journal.pbio.1001508
- 648 49. Dana A, Tuller T. Determinants of Translation Elongation Speed and Ribosomal Profiling Biases in  
649 Mouse Embryonic Stem Cells. *PLoS Comput Biol.* 2012;8. doi:10.1371/journal.pcbi.1002755
- 650 50. Sabi R, Tuller T. A comparative genomics study on the effect of individual amino acids on  
651 ribosome stalling. *BMC Genomics. BioMed Central Ltd*; 2015;16: S5. doi:10.1186/1471-2164-16-  
652 S10-S5
- 653 51. Doerfel LK, Wohlgemuth I, Kothe C, Peske F, Urlaub H, Rodnina M V. EF-P Is Essential for Rapid  
654 Synthesis of Proteins Containing Consecutive Proline Residues. *Science.* 2013;339: 85–88.  
655 doi:10.1126/science.1229017
- 656 52. Ude S, Lassak J, Starosta AL, Kraxenberger T, Wilson DN, Jung K. Translation elongation factor  
657 EF-P alleviates ribosome stalling at Polyproline Stretches. 2013;339: 82–86.  
658 doi:10.1126/science.1228985
- 659 53. Gutierrez E, Shin BS, Woolstenhulme CJ, Kim JR, Saini P, Buskirk AR, et al. eif5A promotes  
660 translation of polyproline motifs. *Mol Cell. Elsevier Inc.*; 2013;51: 35–45.  
661 doi:10.1016/j.molcel.2013.04.021
- 662 54. Sharma AK, O'Brien EP. Non-equilibrium coupling of protein structure and function to translation–  
663 elongation kinetics. *Curr Opin Struct Biol. Elsevier Current Trends*; 2018;49: 94–103.  
664 doi:10.1016/J.SBI.2018.01.005
- 665 55. Dana A, Tuller T. The effect of tRNA levels on decoding times of mRNA codons. *Nucleic Acids*  
666 *Res.* 2014;42: 9171–9181. doi:10.1093/nar/gku646
- 667 56. Sonenberg N, Hinnebusch AG. Regulation of Translation Initiation in Eukaryotes: Mechanisms and  
668 Biological Targets. *Cell. Elsevier Inc.*; 2009;136: 731–745. doi:10.1016/j.cell.2009.01.042

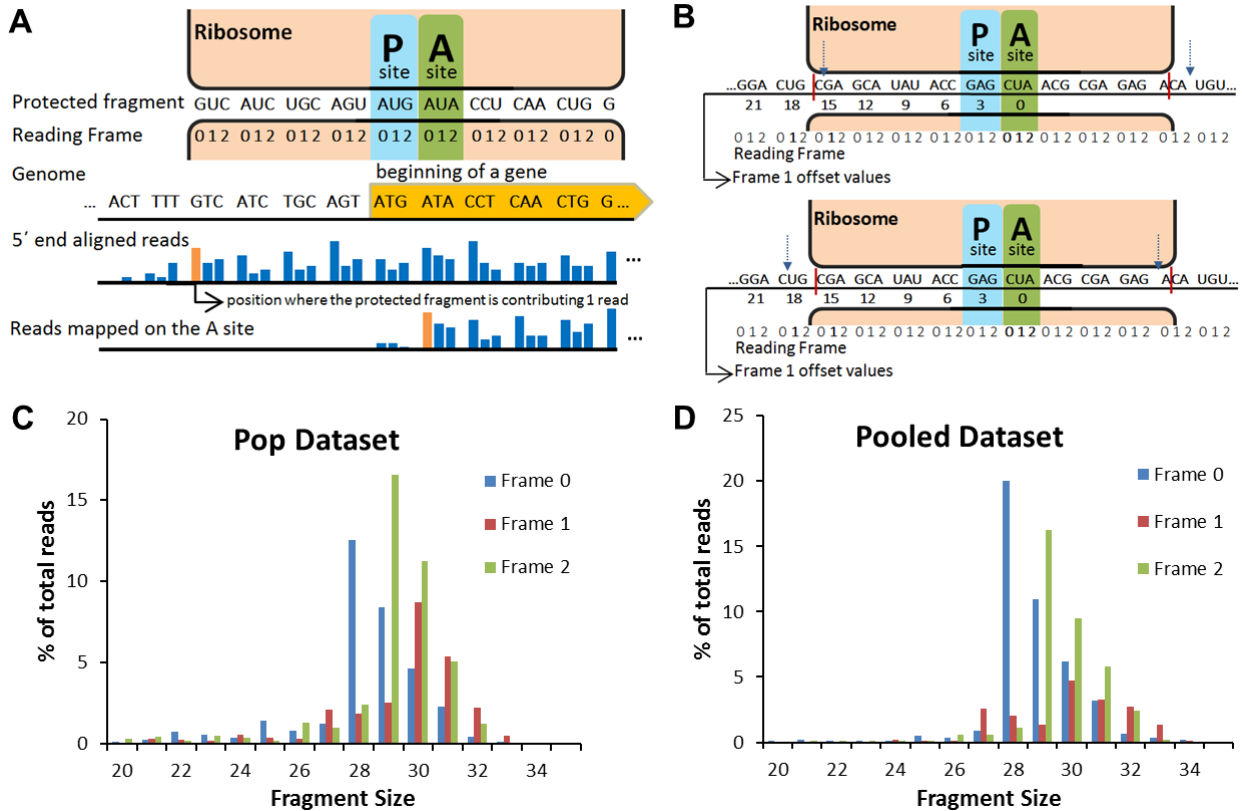

669

670 **Fig 1: The A-site location can be defined as an offset from the 5' end of ribosome-protected**  
 671 **fragments. (A)** A schematic representation of a ribosome beginning translation (top drawing) and of the  
 672 offset between the Ribo-Seq reads mapped with respect to the 5' end of footprints and centered on the A-  
 673 site (orange bar plots). The ribosome is shown protecting a 28 nt fragment with its 5' end in reading frame  
 674 0. The start codon of a gene can only occupy the P-site and hence the A-site was determined to be at an  
 675 offset of 15 nt from the 5' end for fragment size 28 in frame 0 [2]. The P-site and A-site within the fragment  
 676 are indicated. The reads are then shifted from the 5' end to the A-site by the offset value. **(B)** The boundaries  
 677 of the 28 nt ribosome-protected footprint are indicated by red bars. Stochastic nuclease digestion can result  
 678 in different fragment sizes. Two variants of a 29 nt footprint with the 5' end in frame 1 are shown with  
 679 dashed arrows which can result in offsets of 15 nt (top) and 18 nt (bottom), respectively. **(C-D)** mRNA  
 680 fragment size distribution for *S. cerevisiae* Ribo-Seq dataset from Pop and co-workers **(C)** and the Pooled  
 681 dataset **(D)**

682

683



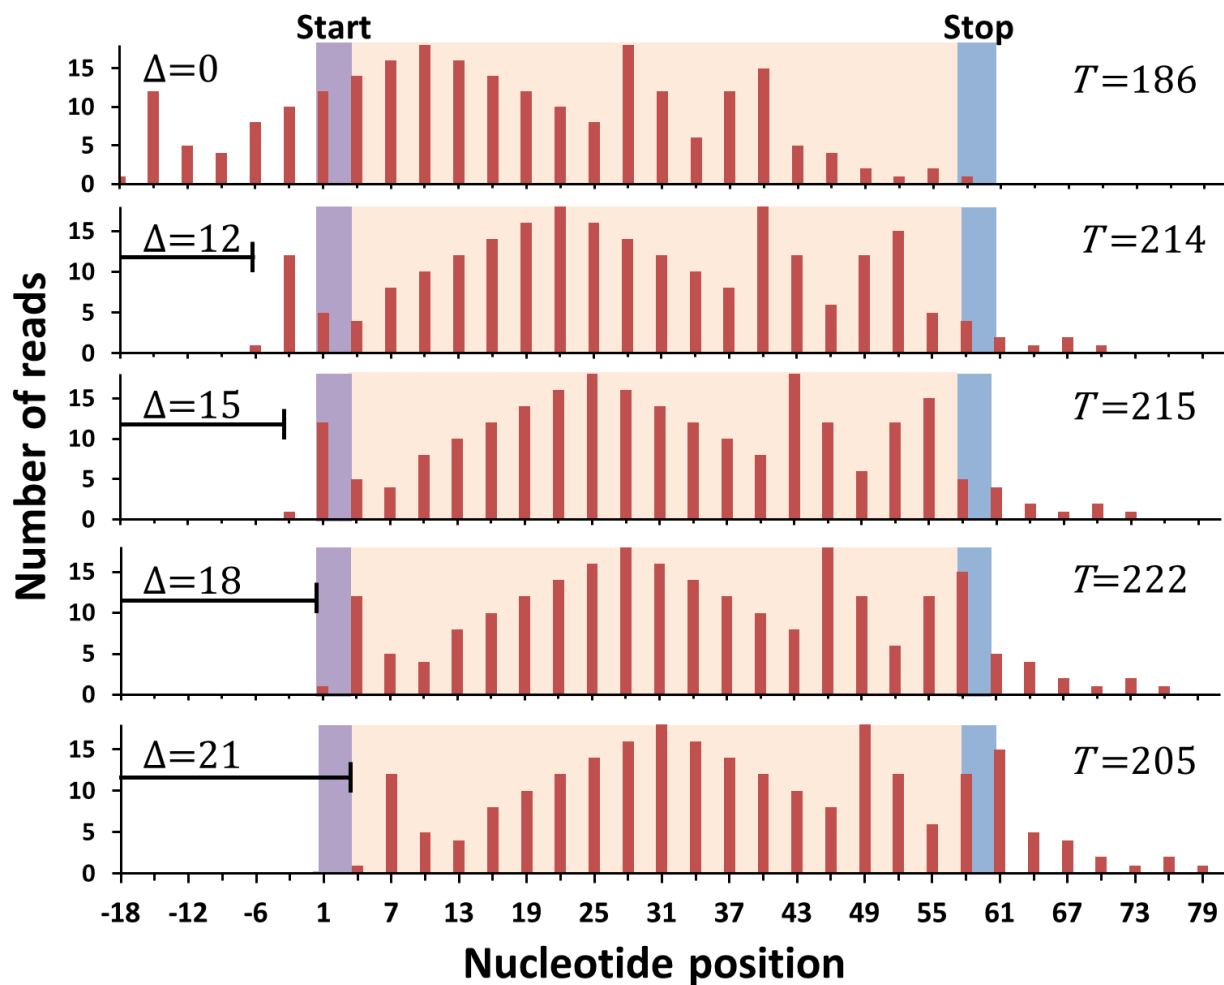

684

685 **Fig 2: An illustration of the application of the Integer Programming algorithm to a Ribosome profile.**  
 686 For a hypothetical transcript that is 60 nt in length the first panel shows the ribosome profile originating from  
 687 reads assigned to the 5' end of fragments of size 33 in frame 0. The start and the stop codon are indicated  
 688 while the rest of the CDS region is colored light peach. The algorithm shifts this ribosome profile by 3 nt  
 689 and calculates the objective function  $T(\Delta | i, S, F)$ . The extent of the shift is the offset  $\Delta$ . Values of  
 690  $T(\Delta | i, S, F)$  for  $\Delta= 12, 15, 18, 21$  nts are indicated. In this example, the average number of reads per codon  
 691 is 7.85. The difference between the top two offsets, 18 ( $T=222$ ) and 15 ( $T=215$ ), is less than the average.  
 692 Hence, we check the secondary criteria (Methods). Offset 18 meets the criteria that the number of reads in  
 693 the start codon is less than one-fifth of the average of reads in second, third and fourth codons and also  
 694 that number of reads in the second codon is greater than reads in third codon. Hence,  $\Delta=18$  nt is the optimal  
 695 offset for this transcript.

696

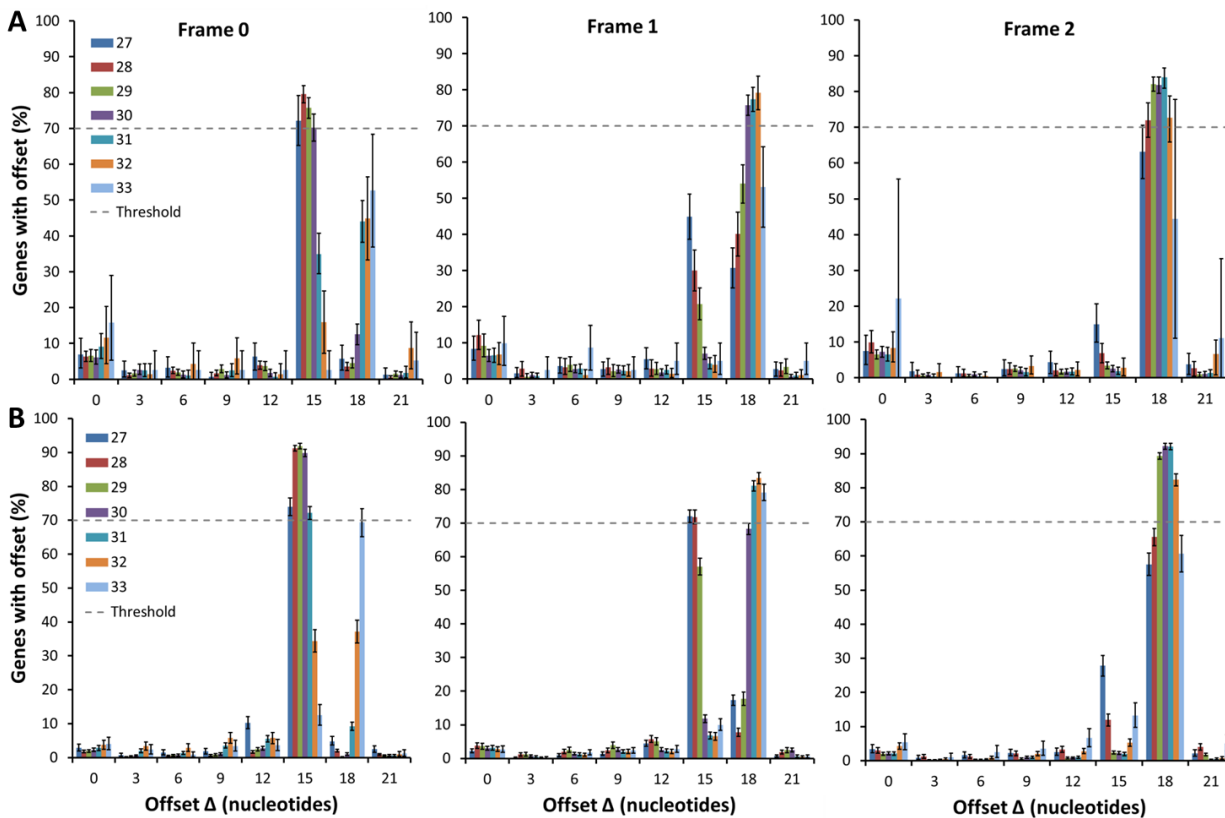

697  
698 **Fig 3: Distribution of offset values from the Integer Programming algorithm applied to transcripts**  
699 **from *S. cerevisiae*.** The data plotted in **(A)** are from the Pop dataset, and **(B)** the Pooled dataset. The  
700 distributions are plotted as a function of the offset value and for fragment sizes of 27 to 33 nt, are shown,  
701 from left to right, for frames 0, 1 and 2. For a given fragment size and frame, the A-site location is at the  
702 most probable  $\Delta$  value in the distribution, provided the offset occurs for more than 70% of the genes (dashed  
703 lines in panels). Error bars represent 95% Confidence intervals calculated using Bootstrapping. Sample  
704 sizes are reported in Table S2.

705

706

707

708

709

710

711

712

713

714

715

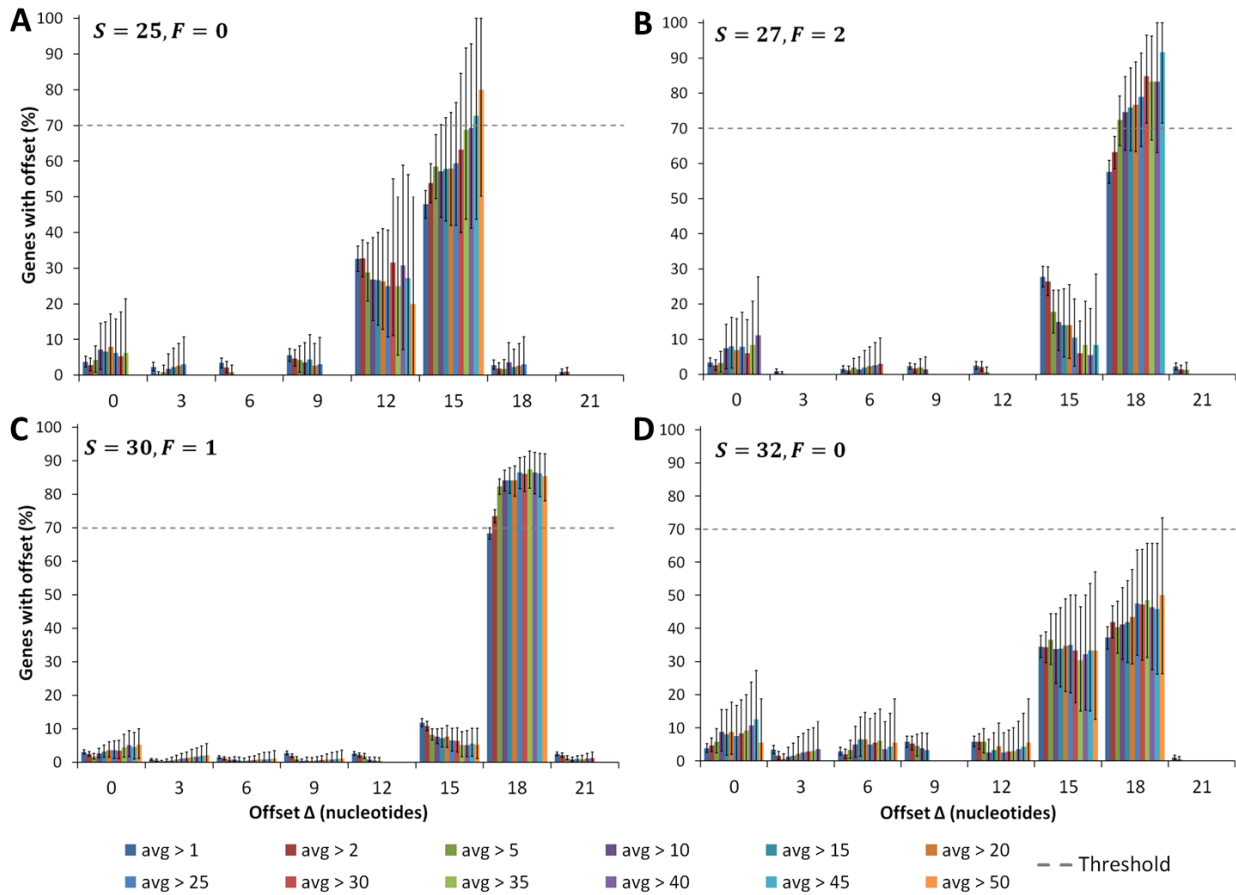

716

717 **Fig 4: Increasing coverage identifies A-site locations for  $S$  and  $F$  combinations that were initially**  
 718 **ambiguous.** Plotted is the percentage of transcripts with a particular  $\Delta$  value for different  $S$  and  $F$   
 719 combinations from the Pooled dataset of *S. cerevisiae*. In each panel, multiple distributions are plotted  
 720 corresponding to transcripts with increasing coverage, indicated by the legend on the right. For example,  
 721 the distributions in blue and red arise from transcripts with, respectively, at least 1 or 2 reads per codon on  
 722 average. We observe the A-site location tends towards 15 nt for  $S = 25, F = 0$  (A) and towards 18 nt for  
 723  $S = 27, F = 2$  (B), and  $S = 30, F = 1$  (C). For  $S = 32, F = 0$  (D), there is no trend even at higher coverage.  
 724 Note that for  $S = 27, F = 2$  (panel B), there are less than 10 genes with an average greater  
 725 than 50 reads per codon and hence we do not include the data point beyond average greater than 45  
 726 reads per codon (see Methods). Error bars represent 95% Confidence intervals calculated using  
 727 Bootstrapping.

728

729

730

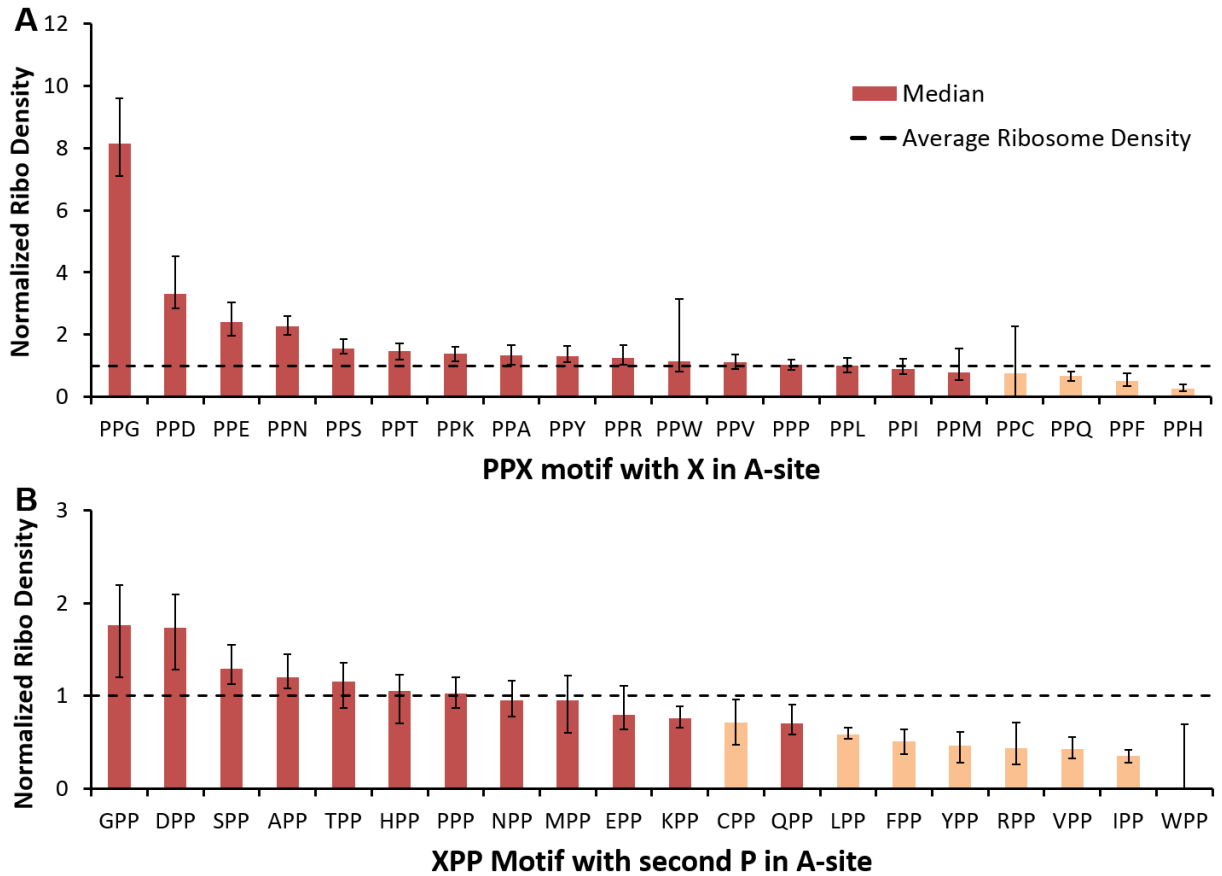

731

732 **Fig 5: Several PPX and XPP motifs lead to ribosomal stalling in *S. cerevisiae*.** The median normalized  
 733 ribosome density is obtained for all instances of **(A)** PPX and **(B)** XPP motifs in which X corresponds to any  
 734 one of the 20 naturally occurring amino acids. Using a permutation test, we determine if the median  
 735 ribosome density is statistically significant or occurs by random chance. Statistically significant motifs are  
 736 highlighted in dark red. This analysis was carried out on the Pop dataset for transcripts in which at least  
 737 50% of codon positions have reads mapped to them. Error bars are 95% Confidence Intervals for the  
 738 median obtained using Bootstrapping.

739

740

741

742

743

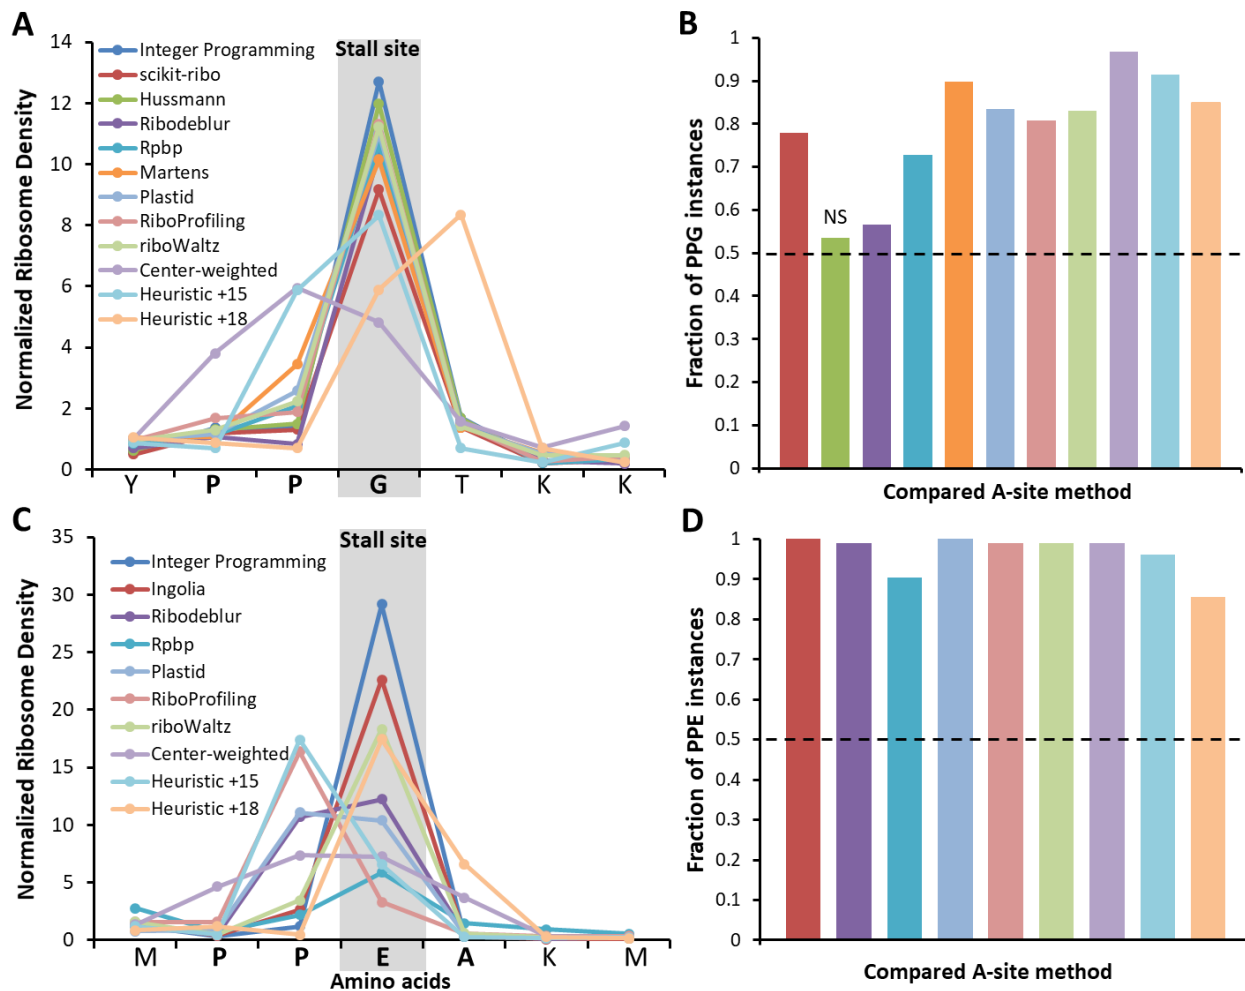

744 **Fig 6: The Integer Programming algorithm correctly assigns greater ribosome density than other**  
 745 **methods to the Glycine in PPG motifs in *S. cerevisiae* and to Glutamic acid in PPE motifs in mESCs.**  
 746 **(A)** Normalized ribosome density obtained using the various methods used to identify the A-site is shown  
 747 for an instance of PPG motif in gene YLR374W with G at codon position 303 in the Pooled dataset of *S.*  
 748 *cerevisiae* (see Legend and Main Text for details about methods). **(B)** The fraction of PPG instances ( $n =$   
 749 224) at which the Integer Programming method yields greater ribosome density at glycine compared to  
 750 every other method. The color-coding is the same as shown in the legend in panel (A). Our method does  
 751 better if it assigns greater ribosome density in more than half the instances (horizontal line in panel B). The  
 752 Integer Programming method does better than all other methods ( $P < 0.0005$ ) except for Hussmann, which  
 753 is not statistically different ( $P = 0.164$ ). **(C)** Normalized ribosome density is shown for an instance of PPE  
 754 motif in gene uc007zma.1 with E at codon position 127 in the Pooled dataset of mouse ESCs (see Legend  
 755 and main text for details about methods). **(D)** The fraction of PPE instances at which the Integer  
 756 Programming method yields greater ribosome density at glutamic acid compared to every other method.  
 757 The color-coding is same as shown in the legend of panel (C). The Integer Programming method does  
 758 better than all other methods ( $P < 10^{-15}$ ) in accurately assigning ribosome density to Glutamic Acid in

759 PPE motifs ( $n = 104$ ). For both analyses, two-sided  $p$ -values were calculated using the Wilcoxon signed  
760 rank test. Error bars represent the 95% Confidence Interval about the median calculated using  
761 Bootstrapping.

762 **Table 1: A-site locations (nucleotide offsets from 5' end) determined by applying the Integer**  
763 **Programming algorithm to the Pooled dataset in *S. cerevisiae* are shown as a function of fragment**  
764 **size and frame.** The top two offset values are listed for those  $S$  and  $F$  combinations in which the A-site  
765 location could not be uniquely determined. For unique offsets, the most-probable offset value is listed.

766

| Fragment Size | Frame 0 | Frame 1 | Frame 2 |
|---------------|---------|---------|---------|
| 24            | 15      | 15/12   | 18/12   |
| 25            | 15      | 12/15   | 18      |
| 26            | 15/12   | 18/15   | 18/15   |
| 27            | 15      | 15      | 18      |
| 28            | 15      | 15      | 18      |
| 29            | 15      | 15/18   | 18      |
| 30            | 15      | 18      | 18      |
| 31            | 15      | 18      | 18      |
| 32            | 18/15   | 18      | 18      |
| 33            | 18      | 18      | 18      |
| 34            | 18      | 18      | 18/21   |

767
